# Supplementary material
Source: Springer Nature journal article supplement (https://www.springermedizin.de/resource/supplementary/12245_2013_172_MOESM2_ESM.pdf/9672926)

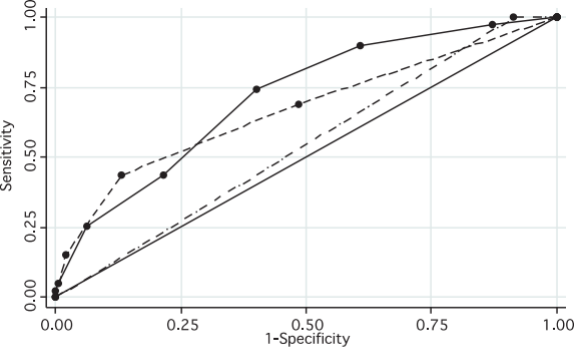

--●-- goldman ROC area: 0.6695      —●— timi ROC area: 0.7147  
-·-●- ahf ROC area: 0.5422      — Reference

Supplement: MOESM2 [file 9672926]
